# Supplementary material
Source: ML conference proceedings conference paper supplement (https://openreview.net/forum?id=saAyrKfQOL)
Supplement: supplementary_material [file attachment]

## A Data Augmentation Loop

### A.1 Pseudo Code

---

**Algorithm 1** DATA AUGMENTATION LOOP

---

**Require:** Human data  $D = (G, a^W)$ , training set  $D_t \in D$ , high-level planner  $\pi^H$ , low-level controller  $\pi^L$ , augmentation iteration  $L$ , data augment function  $L_{aug}()$ , wrist pose trajectories  $G_t = (g_t, g_{t+1}, \dots, g_{t+T-1})$ , goal trajectory of the object and its geometric features  $a_t^W = (a_t^W, a_{t+1}^W, \dots, a_{t+T-1}^W)$ .

- 1: Initialize  $\pi^H, \pi^L, D_t = \{\}$ .
- 2: **for** iteration  $m = 0, 1, \dots, L$  **do**
- 3:   **while** until convergence of  $\pi^H$  **do**
- 4:     Generate augmented data  $L_{aug}(D)$
- 5:     Append into training set  $D_t \leftarrow D_t + L_{aug}(D)$
- 6:     Train  $\pi^H$  on  $D_t$
- 7:   **end while**
- 8:   **while** until convergence of  $\pi^L$  **do**
- 9:     Train  $\pi^L$  on  $(\pi^H(G), G)$
- 10:   **end while**
- 11:   Rollout success trajectories  $D_s^t = (a_t^W, G_t)$  with  $\pi^L$
- 12:   Append into human data  $D \leftarrow D + D_s^t$
- 13: **end for**

---

### A.2 Detail of the Data Augmentation Loop

Below are the details for each augmentation. The unit of length is centimeters and the unit of angle is degrees.

- Random the object’s mesh scales with a small scale:
  - The scale of the width of the manipulated object ranges from 0.9 to 1.1.
  - The scale of the length of the manipulated object ranges from 0.9 to 1.1.
  - The scale of the height of the manipulated object ranges from 0.9 to 1.1.
- Random the object’s initial pose with a small scale:
  - The x-coordinate of the manipulated object ranges from -0.02 to 0.02.
  - The y-coordinate of the manipulated object ranges from -0.02 to 0.02.
  - The manipulated object’s z-axis Euler degree ranges from 0 to 30.
- Modify the goal trajectories of the object with waypoint interpolation:
  - The x-coordinate of the goal trajectories position is added by ranges from -0.02 to 0.02.
  - The y-coordinate of the goal trajectories position is added by ranges from -0.02 to 0.02.
  - The z-coordinate of the goal trajectories position is added by ranges from -0.02 to 0.02.

## B Detail Implementation of RL in Simulation

### B.1 Observation Space

Table.5 gives the specific information of the observation space.

### B.2 Reward Design

Denote the  $\hat{g}_i^R$ ,  $\hat{g}_i^T$  and  $\hat{g}_i^J$  is the current 3D translation, 3D rotation and joint angle of the object respectively, the desired object 3D rotation  $g_i^R$ , the desired object 3D translation  $g_i^T$ , and the desired

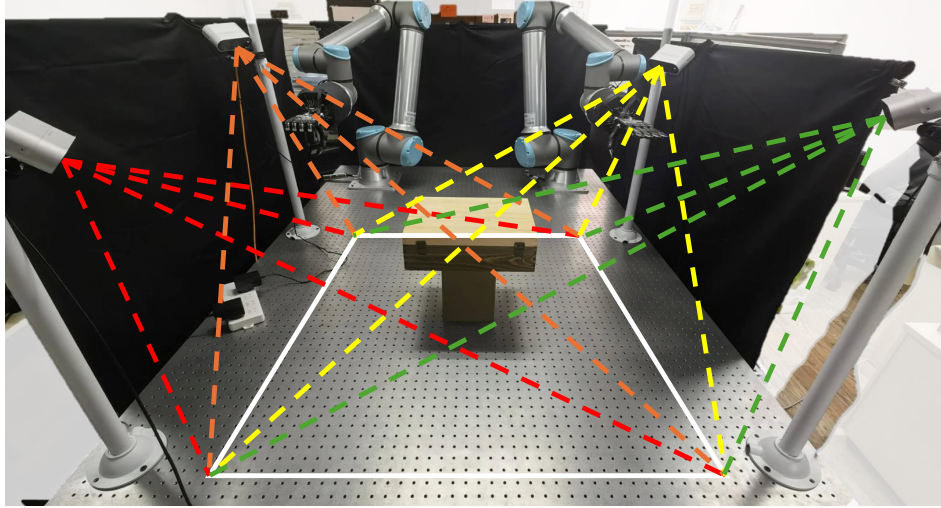

Figure 2: Setup of the cameras.

| Index     | Description                                                                                            |
|-----------|--------------------------------------------------------------------------------------------------------|
| 0 - 60    | right arm-hand dof position, velocity                                                                  |
| 60 - 120  | left arm-hand dof position, velocity                                                                   |
| 120 - 133 | right hand end-effector position, velocity, linear velocity, angle velocity                            |
| 133 - 146 | left hand end-effector position, velocity, linear velocity, angle velocity                             |
| 146 - 159 | object base position, rotation, linear velocity, angle velocity                                        |
| 159 - 172 | articulated object top part position, rotation, linear velocity, angle velocity                        |
| 172 - 185 | articulated object bottom part position, rotation, linear velocity, angle velocity                     |
| 185 - 187 | object dof position, velocity                                                                          |
| 187 - 257 | desired object motion trajectory $G = (g_t, g_{t+1}, \dots, g_{t+T})$                                  |
| 257 - 397 | sequence of 6-DoF wrist actions $(a_t^W, a_{t+1}^W, \dots, a_{t+T}^W)$ generated by high-level planner |
| 397 - 462 | right hand fingertip pose, linear velocity, angle velocity                                             |
| 462 - 527 | left hand fingertip pose, linear velocity, angle velocity                                              |

Table 5: Observation space of our framework in simulation.

object joint angle  $g_i^J$ .  $\lambda_1$ ,  $\lambda_2$  and  $\lambda_3$  is the hyperparameters to balance the weight of each component of the reward.

The reward function is defined as:

$$r_t = \exp^{-(\lambda_1 * \|g_t^R - \hat{g}_t^R\|_2 + \lambda_2 * \|g_t^T - \hat{g}_t^T\|_2 + \lambda_3 * \|g_t^J - \hat{g}_t^J\|_2)} \quad (1)$$

where  $\lambda_1 = 20$ ,  $\lambda_2 = 1$ , and  $\lambda_3 = 5$ .

We use an exponential map in the reward function, which is an effective reward shaping technique used in the case to minimize the distance, introduced by [64, 65]. To improve the calculation efficiency, we use quaternion to represent the object orientation. The angular position difference is then computed through the dot product between the normalized goal quaternion and the current object’s quaternion.

## C Detail Implementation in Real-World

### C.1 Perception

Our perception setup is shown in Figure 2. We arranged 4 identical Femto Bolt cameras around the table and face towards the object. We use FoundationPose [66] to estimate the articulated object pose. To remove the abnormal results, we compare each pose to the desired pose and remove the pose if

the error is smaller than a threshold (5 centimeters in translation and 0.5 radians in orientation). Finally, we average the rest of the poses as our observation for the policy. If none of the poses is smaller than the threshold, we continue to use the pose from the previous frame.

## C.2 Policy Distillation

We use the DAgger [67] algorithm for policy distillation. Table.6 gives the specific information of the observation space of the distilled policy.

| Index     | Description                                                                                            |
|-----------|--------------------------------------------------------------------------------------------------------|
| 0 - 24    | right hand dof position                                                                                |
| 24 - 48   | left hand dof position                                                                                 |
| 48 - 55   | right hand end-effector position, rotation                                                             |
| 55 - 62   | left hand end-effector position, rotation                                                              |
| 62 - 69   | articulated object top part position, rotation                                                         |
| 69 - 76   | articulated object bottom part position, rotation                                                      |
| 76 - 77   | object dof position                                                                                    |
| 77 - 147  | desired object motion trajectory $G = (g_t, g_{t+1}, \dots, g_{t+T})$                                  |
| 147 - 287 | sequence of 6-DoF wrist actions $(a_t^W, a_{t+1}^W, \dots, a_{t+T}^W)$ generated by high-level planner |

Table 6: Observation space of our framework in the real-world.

## C.3 Resets

In the real-world evaluation, we used a trajectory from the ARCTIC dataset as our goal trajectory. In terms of resets in our real-world experiments, we pose the object within 3 centimeters and 0.5 radians of the initial pose of the goal trajectory during resets. We evaluated 20 times and reported the completion rate.

## C.4 Evaluation

When evaluating real-world experiments, we take the same metric (completion rate) as in simulation. It will fail if the tolerance is exceeded (5 centimeters in translation, 2.5 centimeters in object’s longest dimension multiplied by rotation angle, and 0.5 radians in joint angle), and record the completion rate.

## D Hyperparameters of the PPO

Table.7 gives the hyperparameters of the PPO.

| Hyperparameters          | Value                  |
|--------------------------|------------------------|
| Num mini-batches         | 4                      |
| Num opt-epochs           | 5                      |
| Num episode-length       | 8                      |
| Hidden size              | [1024, 1024, 512, 256] |
| Clip range               | 0.2                    |
| Max grad norm            | 1                      |
| Learning rate            | 3.e-4                  |
| Discount ( $\gamma$ )    | 0.998                  |
| GAE lambda ( $\lambda$ ) | 0.95                   |
| Init noise std           | 0.8                    |
| Desired kl               | 0.02                   |
| Ent-coef                 | 0                      |

Table 7: Hyperparameters of PPO.

## E Domain Randomization

Isaac Gym provides lots of domain randomization functions for RL training. We add the randomization for all the tasks as shown in Table. 8 for each environment. we generate new randomization every 1000 simulation steps.

| Parameter                 | Type     | Distribution | Initial Range |
|---------------------------|----------|--------------|---------------|
| <b>Robot</b>              |          |              |               |
| Mass                      | Scaling  | uniform      | [0.5, 1.5]    |
| Friction                  | Scaling  | uniform      | [0.7, 1.3]    |
| Joint Lower Limit         | Scaling  | loguniform   | [0.0, 0.01]   |
| Joint Upper Limit         | Scaling  | loguniform   | [0.0, 0.01]   |
| Joint Stiffness           | Scaling  | loguniform   | [0.0, 0.01]   |
| Joint Damping             | Scaling  | loguniform   | [0.0, 0.01]   |
| <b>Object</b>             |          |              |               |
| Mass                      | Scaling  | uniform      | [0.5, 1.5]    |
| Friction                  | Scaling  | uniform      | [0.5, 1.5]    |
| Scale                     | Scaling  | uniform      | [0.95, 1.05]  |
| Position Noise            | Additive | gaussian     | [0.0, 0.02]   |
| Rotation Noise            | Additive | gaussian     | [0.0, 0.2]    |
| <b>Observation</b>        |          |              |               |
| Obs Correlated. Noise     | Additive | gaussian     | [0.0, 0.001]  |
| Obs Uncorrelated. Noise   | Additive | gaussian     | [0.0, 0.002]  |
| <b>Action</b>             |          |              |               |
| Action Correlated Noise   | Additive | gaussian     | [0.0, 0.015]  |
| Action Uncorrelated Noise | Additive | gaussian     | [0.0, 0.05]   |
| <b>Environment</b>        |          |              |               |
| Gravity                   | Additive | normal       | [0, 0.4]      |

Table 8: Domain randomization of all the tasks.

## F Goal Representation

Our framework requires the full 6D pose of the object trajectory at each time-step. For downstream tasks, we are able to get the trajectories in many ways. For example, we can specify a few key poses of the object based on the task, and use linear interpolation to generate the pose trajectories between the key poses. Another solution is to use some object motion synthesis methods in the field of graphics to generate the 6D pose of the object trajectory, such as [68]. We design an additional experiment to prove that our method can work with this setup. Taking a task “lifting up the box in the air and dropping it down” as an example, we can just simply manually define the pose of the box in the air and the landing point after picking it up as the key poses, then interpolate it as our goal trajectory, and train the robot to manipulate the object to follow the goal trajectory. The results are shown in Table 9 and the snapshot are shown in Figure 3. The results show that we can complete the task under this setting, and shows that our framework is extensible.

|     | Box           | Manually Designed Trajectory |
|-----|---------------|------------------------------|
| Our | 100 $\pm$ 0.0 | 100 $\pm$ 0.0                |

Table 9: Results for the goal representation experiments.

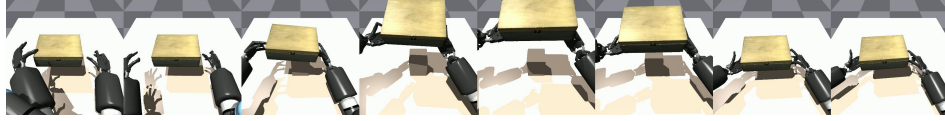

Figure 3: Snapshots of the goal representation experiment.

## G Time-indexed of the Goal Trajectory

For the time-indexed of the goal trajectory, we randomize the sampling of input trajectories with various time gaps during training. We added an additional experiment to show that varying the time gap does not significantly affect our performance, indicating that our approach maintains generalization despite these temporal constraints. Using Coffee Maker as an example, we interpolated the goal trajectories provided by ARCTIC datasets to varying levels, and tested the completion rate of our policy on it. Origin represents the original goal trajectory from ARCTIC, and Skip 2 and Skip 1 represent skipping 2/1 poses between every two poses on the basis of origin goal trajectory. Inter 2 and Inter 1 represent insertion of 2/1 pose between every two poses according to the linear interpolation method on the basis of origin goal trajectory. Our policy generates robot actions conditioned on a sequence of object goal poses, with the time gaps defined by the distance between each consecutive goal pose. In this experiment, we randomly use time gaps of 0 to 3 units when sampling the object trajectory to test whether the policy is sensitive to these time gaps (Random Sample). The results is shown in Table 10, the performance of the trained policy will not vary greatly.

|     | Skip 2         | Skip 1         | Origin         | Inter 1        | Inter 2        | Random Sample  |
|-----|----------------|----------------|----------------|----------------|----------------|----------------|
| Our | $85.7 \pm 7.5$ | $86.5 \pm 3.4$ | $86.1 \pm 5.5$ | $85.4 \pm 8.1$ | $87.2 \pm 4.8$ | $86.2 \pm 6.2$ |

Table 10: Results for the time-indexed experiments.

## H Model-base Baselines

We add a baseline of the model-based method in the simulation, the result is shown in Table 11. We use the sample-based model predictive control method that is modified from [69] as our low-level controller in our tasks. Our method outperforms the sample-based model predictive control by 46.3% on average.

|      | Box                  | Coffee<br>Maker       | Espresso<br>Machine   | Ketch                  | Micro-<br>wave       | Mixer                 | Note-<br>book         | Scis-<br>sors          | Laptop               |
|------|----------------------|-----------------------|-----------------------|------------------------|----------------------|-----------------------|-----------------------|------------------------|----------------------|
| MPC  | 31.6 $\pm$ 1.5       | 22.8 $\pm$ 0.7        | 30.4 $\pm$ 2.3        | 24.8 $\pm$ 1.3         | 28.6 $\pm$ 1.9       | 26.8 $\pm$ 0.5        | 19.2 $\pm$ 2.0        | 23.6 $\pm$ 0.8         | 24.0 $\pm$ 1.4       |
| Ours | <b>100</b> $\pm$ 0.0 | <b>86.1</b> $\pm$ 5.5 | <b>81.1</b> $\pm$ 8.6 | <b>41.2</b> $\pm$ 13.3 | <b>100</b> $\pm$ 0.0 | <b>57.6</b> $\pm$ 4.9 | <b>38.7</b> $\pm$ 3.3 | <b>41.4</b> $\pm$ 14.9 | <b>100</b> $\pm$ 0.0 |

Table 11: Results for the experiments of using one policy per object.
